# Supplementary material
Source: MDPI journal article supplement (https://www.mdpi.com/2071-1050/15/9/7442)
Supplement: s1 [file s1]

## Supplementary Materials

**Supplementary Table S1.** Material inventory when recovering Ni-Co-containing saggars.

| Process                | Sort   | Material                        | Standard             | Quantity  | Unit | Note                        |
|------------------------|--------|---------------------------------|----------------------|-----------|------|-----------------------------|
| Physical separation    | Input  | Electricity                     |                      | 29.7 MJ   |      |                             |
|                        |        | Water                           |                      | 148 kg    |      |                             |
|                        |        | Saggar bodies                   | Moisture content 10% | 1000 kg   |      | Main raw material           |
|                        | Output | Polishing powder                | Moisture content 30% | 171.4 kg  |      | For reduction and leaching  |
|                        |        | Ceramic aggregate               |                      | 977.8 kg  |      | For sale                    |
| Reduction and leaching | Input  | Electricity                     |                      | 17.82 MJ  |      |                             |
|                        |        | Polishing powder                | Moisture content 30% | 171.4 kg  |      | From physical separation    |
|                        |        | Reducing agent                  |                      | 12 kg     |      |                             |
|                        |        | Sulfuric acid                   | 98%                  | 216 kg    |      |                             |
|                        | Output | Water                           |                      | 376 kg    |      |                             |
|                        |        | Acidic leaching liquor          |                      | 647 kg    |      | For cascade separation      |
|                        |        | Leaching residue                | Moisture content 60% | 128.4 kg  |      | Solid waste                 |
|                        |        |                                 |                      |           |      |                             |
| Cascade separation     | Input  | Acidic leaching liquor          |                      | 647 kg    |      | From reduction and leaching |
|                        |        | Electricity                     |                      | 14.256 MJ |      |                             |
|                        |        | Potassium sulfate               |                      | 20 kg     |      |                             |
|                        |        | Potassium hydroxide             | Industrial grade     | 55.6 kg   |      |                             |
|                        |        | Potassium sulfate mother liquor | Saturated solution   | 59.6 kg   |      | From crystallization        |
|                        | Output | Steam                           |                      | 12 kg     |      |                             |
|                        |        | Water                           |                      | 85.6 kg   |      |                             |
|                        |        | Crude Ni-Co-Mn precursor        |                      | 5.8 kg    |      | For purification            |
|                        |        | Filter liquor                   |                      | 693.2 kg  |      | For crystallization         |
|                        |        |                                 |                      |           |      |                             |

|                 |        |                            |                  |          |                         |
|-----------------|--------|----------------------------|------------------|----------|-------------------------|
| Crystallization | Input  | Aluminum hydroxide         | Industrial grade | 1.2 kg   | For sale                |
|                 |        | Alum                       | Industrial grade | 166.2 kg | For sale                |
|                 |        | Magnesium hydroxide        | Industrial grade | 1.4 kg   | For sale                |
|                 |        | Electricity                |                  | 59.4 MJ  |                         |
|                 |        | Filter liquor              |                  | 693.2 kg | From crystallization    |
|                 | Output | Potassium carbonate        | Industrial grade | 66 kg    |                         |
|                 |        | Steam                      |                  | 198 kg   |                         |
|                 |        | Water                      | Pure water       | 96.4 kg  |                         |
|                 |        | Concentrated mother liquor |                  | 59.6 kg  | For cascade separation  |
|                 |        | Crude lithium carbonate    |                  | 35.2 kg  | For purification        |
| Purification    | Input  | Condensed water            |                  | 656.8 kg | Recycling               |
|                 |        | Potassium sulfate          | Industrial grade | 104 kg   | For sale                |
|                 |        | Ammonia water              | 25%              | 9 kg     |                         |
|                 |        | Carbon dioxide             |                  | 11 kg    |                         |
|                 |        | Crude lithium carbonate    |                  | 35.2 kg  | From crystallization    |
|                 | Output | Crude Ni-Co-Mn precursor   |                  | 5.8 kg   | From cascade separation |
|                 |        | Electricity                |                  | 7.2 MJ   |                         |
|                 |        | Sodium hydroxide           |                  | 6 kg     |                         |
|                 |        | Steam                      |                  | 10 kg    |                         |
|                 |        | Sulfuric acid              | 98%              | 10 kg    |                         |
|                 |        | Water                      |                  | 16 kg    |                         |
|                 |        | Calcium                    |                  |          |                         |
|                 |        | Magnesium slag             |                  | 1.8 kg   | Solid waste             |

|                    |               |         |               |
|--------------------|---------------|---------|---------------|
| Water              |               | 58 kg   | For treatment |
| Lithium carbonate  | Battery grade | 28.2 kg | For sale      |
| Ni-Co-Mn precursor | Battery grade | 5 kg    | For sale      |

**Supplementary Table S2.** Data quality assessment of the life cycle data of Ni-Co-containing saggar recovery.

| Unit: %   | Completely representative | Partly representative | Not representative |
|-----------|---------------------------|-----------------------|--------------------|
| Technique | 91.2                      | 8.8                   | 0                  |
| Location  | 61.8                      | 38.2                  | 0                  |
| Time      | 100                       | 0                     | 0                  |

**Supplementary Table S3.** Monte Carlo analysis of the Ni-Co-containing saggar recovery results.

|                 | Unit                        | Mean     | SD       | CV (%)   |
|-----------------|-----------------------------|----------|----------|----------|
| Mass - Input    | kg                          | 2.99E+05 | 1.76E-06 | 5.89E-10 |
| Mass - Output   | kg                          | 3.00E+05 | 1.56E-06 | 5.20E-10 |
| Midpoint - GWP  | kg CO <sub>2</sub> eq.      | 3.33E+02 | 1.03E-06 | 3.09E-07 |
| Midpoint - PMFP | kg PM <sub>2.5</sub> eq.    | 6.74E-01 | 1.82E-06 | 2.70E-04 |
| Midpoint - FFP  | MJ eq.                      | 1.55E+02 | 1.84E-06 | 1.19E-06 |
| Midpoint - WCP  | m <sup>3</sup>              | 2.94E+02 | 0.00E+00 | 0.00E+00 |
| Midpoint - FETP | kg 1,4 DB eq.               | 5.13E-02 | 1.77E-06 | 3.45E-03 |
| Midpoint - FEP  | kg P eq.                    | 5.63E-04 | 2.52E-06 | 4.48E-01 |
| Midpoint - HTP  | kg 1,4-DB eq.               | 5.82E+00 | 4.60E-07 | 7.90E-06 |
| Midpoint - IRP  | kBq Co-60 eq. to air        | 3.17E+01 | 1.58E-06 | 4.98E-06 |
| Midpoint - LOP  | Annual crop eq.·y           | 4.75E+00 | 5.64E-07 | 1.19E-05 |
| Midpoint - METP | kg 1,4-DB eq.               | 4.51E+02 | 0.00E+00 | 0.00E+00 |
| Midpoint - ME   | kg N eq.                    | 1.80E-02 | 1.35E-06 | 7.50E-03 |
| Midpoint - SOP  | kg Cu eq.                   | 3.77E+00 | 2.49E-06 | 6.60E-05 |
| Midpoint - OFP  | kg NO <sub>x</sub> eq.      | 8.17E-01 | 1.64E-06 | 2.01E-04 |
| Midpoint - ODP  | kg CFC-11 eq.               | 1.21E-04 | 2.49E-06 | 2.06E+00 |
| Midpoint - AP   | kg SO <sub>2</sub> eq.      | 2.33E+00 | 1.54E-06 | 6.61E-05 |
| Midpoint - TETP | kg 1,4-DB eq.               | 7.37E+01 | 7.75E-07 | 1.05E-06 |
| Endpoint        | Weighted person equivalents | 4.50E+02 | 2.16E-06 | 4.80E-07 |
